# Supplementary material for: History and current status of clinical studies using human pluripotent stem cells
Source: PubMed Central journal article supplement (PMC10444540; doi:10.1016/j.stemcr.2023.03.005), 2023-04-06
Supplement: mmc1.pdf [file mmc1.pdf]

**Stem Cell Reports, Volume 18**

**Supplemental Information**

**History and current status of clinical studies using human pluripotent stem cells**

**Sabine Kobold, Nils Bultjer, Glyn Stacey, Sabine C. Mueller, Andreas Kurtz, and Nancy Mah**

## **Supplementary Information for:**

### History and current status of clinical studies using human pluripotent stem cells

Sabine Kobold<sup>1</sup>, Nils Bultjer<sup>1</sup>, Glyn Stacey<sup>2</sup>, Sabine C. Mueller<sup>1</sup>, Andreas Kurtz<sup>1,3</sup>, Nancy Mah<sup>1</sup>

<sup>1</sup>Fraunhofer-Institut für Biomedizinische Technik (IBMT), Joseph-von-Fraunhofer Weg 1, 66280 Sulzbach, Germany

<sup>2</sup> International Stem Cell Banking Initiative, 2 High Street, Barley SG88HZ, UK

<sup>3</sup>Berlin Institute of Health Center for Regenerative Therapies, Augustenburger Platz 1, 13353 Berlin, Germany

## **List of Supplementary Information**

**Supplementary Figure S1.** World map of clinical study sites, related to section “Where and who carries out clinical studies”.

**Supplementary Table S1.** PSC lines used as starting materials for the production of cell-based therapeutics, related to section “Traceability of the source PSC lines employed in PSC-based therapies”.

**Supplementary Table S2.** Target diseases of PSC-derived cell therapies, related to section “Cell types and their target indications for PSC-based therapies”.

**Supplementary Table S3.** Cell types used for PSC-derived cell-based therapies (last 10 years) and target indications, related to section “Cell types and their target indications for PSC-based therapies”.

**Figure S1.** World map of clinical study sites, related to section “Where and who carries out clinical studies”.

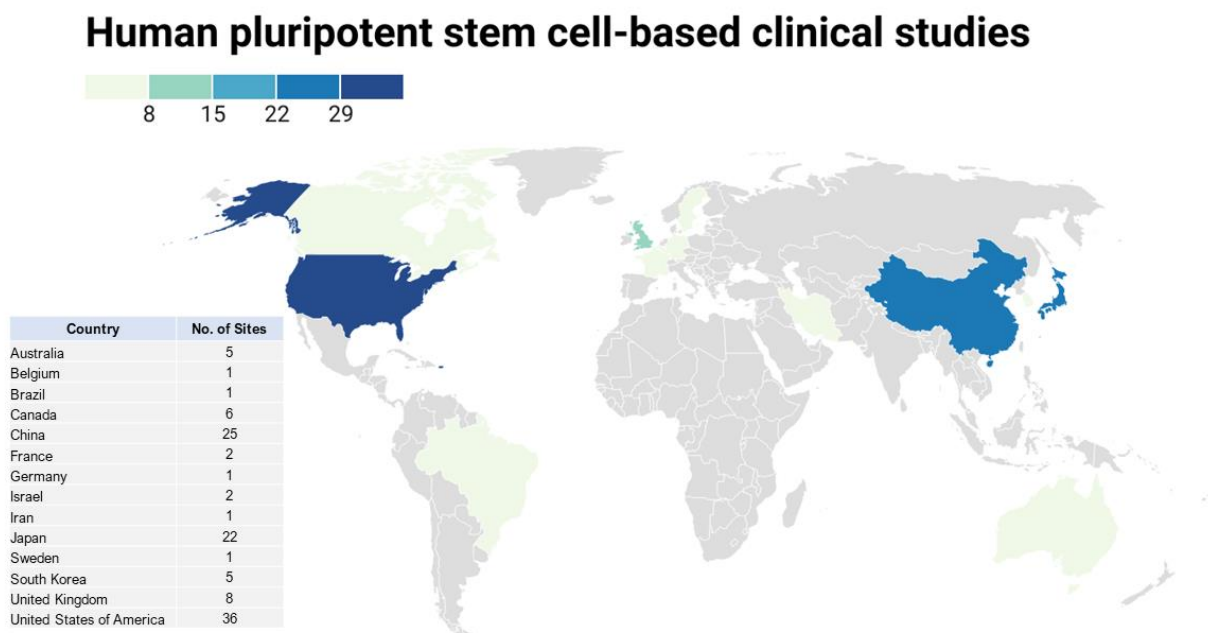

Data as of December 13, 2022

Created with Datawrapper

**Table S1.** PSC lines used as starting materials for the production of cell-based therapeutics, related to section “Traceability of the source PSC lines employed in PSC-based therapies”.

| PSC line common name                 | hPSCreg® cell line ID | Year of First Publication of the Cell Line | No. of Clinical Trials |
|--------------------------------------|-----------------------|--------------------------------------------|------------------------|
| Human embryonic stem cells           |                       |                                            |                        |
| MA09                                 | ACTe002-A             | 2006                                       | 13                     |
| CyT49                                | VCYTe001-A            | 2006                                       | 6                      |
| H1                                   | WAe001-A              | 1998                                       | 3                      |
| H9                                   | WAe009-A              | 1998                                       | 2                      |
| Shef-1                               | AXORe001-A            | 2004                                       | 2                      |
| HAD-C 100                            | HADe008-A             | 2012                                       | 1                      |
| HAD-C 102                            | HADe007-A             | 2012                                       | 1                      |
| I6                                   | TECHe003-A            | 2002                                       | 1                      |
| RC17                                 | RCe021-A              | 2016                                       | 1                      |
| RC9                                  | RCe013-A              | 2012                                       | 1                      |
| Q-CTS-hESC-2                         | Not registered        | 2016                                       | 1                      |
| Unknown ESC                          |                       |                                            | 19                     |
| Human induced pluripotent stem cells |                       |                                            |                        |
| QHJI                                 | Not registered        | 2019                                       | 3                      |
| Unknown iPSC                         |                       |                                            | 51                     |

**Table S2.** Target diseases of PSC-derived cell therapies, related to section “Cell types and their target indications for PSC-based therapies”.

| Disease (ICD-10 classification)                                                 | Cellular Origin of Cell Product |           |          |          | Total     |
|---------------------------------------------------------------------------------|---------------------------------|-----------|----------|----------|-----------|
|                                                                                 | hESC                            | hiPSC     | hpSC     | hSCNT    |           |
| <b>Diseases of the eye and adnexa</b>                                           | <b>24</b>                       | <b>9</b>  | <b>0</b> | <b>1</b> | <b>34</b> |
| Degeneration of macula and posterior pole: Senile macular degeneration, dry AMD | 11                              | 3         |          | 1        |           |
| Other retinal disorders                                                         | 4                               | 2         |          |          |           |
| Hereditary retinal dystrophy: Stargardt disease                                 | 5                               |           |          |          |           |
| Hereditary retinal dystrophy: retinitis pigmentosa                              | 2                               | 1         |          |          |           |
| Hereditary retinal dystrophy                                                    | 1                               |           |          |          |           |
| Bullous keratopathy                                                             |                                 | 1         |          |          |           |
| Other specified disorders of cornea                                             |                                 | 1         |          |          |           |
| Degeneration of macula and posterior pole: wet age-related macular degeneration |                                 | 1         |          |          |           |
| Myopia                                                                          | 1                               |           |          |          |           |
| <b>Neoplasms</b>                                                                | <b>1</b>                        | <b>17</b> | <b>0</b> | <b>0</b> | <b>18</b> |
| Malignant neoplasms                                                             |                                 | 5         |          |          |           |
| Myeloid leukaemia                                                               |                                 | 3         |          |          |           |
| Other and unspecified types of non-Hodgkin lymphoma                             |                                 | 2         |          |          |           |
| Chronic lymphocytic leukaemia of B-cell type                                    |                                 | 2         |          |          |           |
| Malignant neoplasm of ovary                                                     |                                 | 2         |          |          |           |
| Head, face and neck                                                             |                                 | 1         |          |          |           |
| Malignant neoplasm of bronchus and lung                                         | 1                               |           |          |          |           |
| Malignant neoplasm of breast                                                    |                                 | 1         |          |          |           |
| Multiple myeloma                                                                |                                 | 1         |          |          |           |
| <b>Diseases of the circulatory system</b>                                       | <b>3</b>                        | <b>13</b> | <b>0</b> | <b>0</b> | <b>16</b> |
| Ischaemic cardiomyopathy                                                        |                                 | 7         |          |          |           |
| Cerebral infarction, unspecified                                                | 1                               | 2         |          |          |           |
| Heart failure, unspecified                                                      |                                 | 2         |          |          |           |
| Left ventricular failure                                                        | 1                               |           |          |          |           |
| Ischaemic heart diseases                                                        | 1                               |           |          |          |           |
| Congestive heart failure                                                        |                                 | 1         |          |          |           |
| Dilated cardiomyopathy                                                          |                                 | 1         |          |          |           |
| <b>Diseases of the nervous system</b>                                           | <b>5</b>                        | <b>3</b>  | <b>2</b> | <b>0</b> | <b>10</b> |
| Parkinson disease                                                               | 2                               | 3         | 2        |          |           |
| Multiple sclerosis                                                              | 1                               |           |          |          |           |
| Epilepsy                                                                        | 1                               |           |          |          |           |
| Motor neuron disease                                                            | 1                               |           |          |          |           |

| Disease (ICD-10 classification)                                                                            | Cellular Origin of Cell Product |           |          |          | Total      |
|------------------------------------------------------------------------------------------------------------|---------------------------------|-----------|----------|----------|------------|
|                                                                                                            | hESC                            | hiPSC     | hpSC     | hSCNT    |            |
| <b>Endocrine, nutritional and metabolic diseases</b>                                                       | <b>9</b>                        | <b>2</b>  | <b>0</b> | <b>0</b> | <b>11</b>  |
| Unspecified diabetes mellitus with multiple complications with diabetic foot syndrome, controlled          |                                 | 1         |          |          |            |
| Type 1 diabetes mellitus                                                                                   | 7                               | 1         |          |          |            |
| Disorders of urea cycle metabolism                                                                         | 1                               |           |          |          |            |
| Primary ovarian failure                                                                                    | 1                               |           |          |          |            |
| <b>Injury, poisoning and certain other consequences of external causes</b>                                 | <b>3</b>                        | <b>4</b>  | <b>0</b> | <b>0</b> | <b>7</b>   |
| Injury of spinal cord, level unspecified                                                                   | 3                               | 1         |          |          |            |
| Tear of articular cartilage of knee, current                                                               |                                 | 2         |          |          |            |
| Bone-marrow transplant rejection                                                                           |                                 | 1         |          |          |            |
| <b>Diseases of the blood and blood-forming organs and certain disorders involving the immune mechanism</b> | <b>0</b>                        | <b>4</b>  | <b>0</b> | <b>0</b> | <b>4</b>   |
| Beta thalassaemia                                                                                          |                                 | 2         |          |          |            |
| Thrombocytopenia, unspecified                                                                              |                                 | 1         |          |          |            |
| Other aplastic anaemias                                                                                    |                                 | 1         |          |          |            |
| <b>Provisional assignment of new diseases of uncertain etiology or emergency use</b>                       | <b>2</b>                        | <b>2</b>  | <b>0</b> | <b>0</b> | <b>4</b>   |
| COVID-19                                                                                                   | 2                               | 2         |          |          |            |
| <b>Diseases of the genitourinary system</b>                                                                | <b>2</b>                        | <b>0</b>  | <b>0</b> | <b>0</b> | <b>2</b>   |
| Intrauterine synechiae                                                                                     | 1                               |           |          |          |            |
| Interstitial cystitis (chronic)                                                                            | 1                               |           |          |          |            |
| <b>Arthropathies</b>                                                                                       | <b>0</b>                        | <b>1</b>  | <b>0</b> | <b>0</b> | <b>1</b>   |
| Osteoarthritis of knee, unspecified                                                                        |                                 | 1         |          |          |            |
| <b>Diseases of the digestive system</b>                                                                    | <b>1</b>                        | <b>0</b>  | <b>0</b> | <b>0</b> | <b>1</b>   |
| Acute and subacute hepatic failure                                                                         | 1                               |           |          |          |            |
| <b>Diseases of the musculoskeletal system and connective tissue</b>                                        | <b>1</b>                        | <b>0</b>  | <b>0</b> | <b>0</b> | <b>1</b>   |
| Derangement of meniscus due to old tear or injury                                                          | 1                               |           |          |          |            |
| <b>Totals</b>                                                                                              | <b>51</b>                       | <b>55</b> | <b>2</b> | <b>1</b> | <b>109</b> |

**Table S3.** Cell types used for PSC-derived cell-based therapies (last 10 years) and target indications, related to section “Cell types and their target indications for PSC-based therapies”.

| Cell types used for therapy                                    | 2013     | 2014     | 2015     | 2016     | 2017     | 2018     | 2019     | 2020     | 2021     | 2022     | Total     |
|----------------------------------------------------------------|----------|----------|----------|----------|----------|----------|----------|----------|----------|----------|-----------|
| <b>retinal pigment epithelial cell</b>                         | <b>4</b> |          | <b>5</b> | <b>2</b> | <b>2</b> | <b>3</b> |          | <b>2</b> | <b>2</b> | <b>2</b> | <b>22</b> |
| age related macular degeneration                               | 2        |          | 2        | 2        | 2        | 2        |          | 1        | 1        | 1        | 13        |
| dystrophies primarily involving the retinal pigment epithelium |          |          |          |          |          |          |          |          | 1        |          | 1         |
| macular degeneration                                           |          |          | 2        |          |          | 1        |          |          |          |          | 3         |
| myopic macular degeneration                                    | 1        |          |          |          |          |          |          |          |          |          | 1         |
| retinitis pigmentosa                                           |          |          | 1        |          |          |          |          | 1        |          |          | 2         |
| RPE impaired disease                                           |          |          |          |          |          |          |          |          |          | 1        | 1         |
| Stargardt disease                                              | 1        |          |          |          |          |          |          |          |          |          | 1         |
| <b>natural killer cell</b>                                     |          |          |          |          |          |          | <b>3</b> | <b>6</b> | <b>7</b> | <b>2</b> | <b>18</b> |
| acute myeloid leukemia                                         |          |          |          |          |          |          | 1        | 1        | 1        |          | 3         |
| advanced malignant solid neoplasm                              |          |          |          |          |          |          | 2        | 1        | 1        | 1        | 5         |
| B-Cell malignant neoplasm                                      |          |          |          |          |          |          |          |          |          | 1        | 1         |
| breast cancer                                                  |          |          |          |          |          |          |          |          | 1        |          | 1         |
| chronic lymphocytic leukemia                                   |          |          |          |          |          |          |          | 1        | 1        |          | 2         |
| COVID-19                                                       |          |          |          |          |          |          |          | 1        |          |          | 1         |
| head and neck cancer                                           |          |          |          |          |          |          |          | 1        |          |          | 1         |
| multiple myeloma                                               |          |          |          |          |          |          |          |          | 1        |          | 1         |
| non-Hodgkin lymphoma                                           |          |          |          |          |          |          |          | 1        |          |          | 1         |
| ovarian cancer                                                 |          |          |          |          |          |          |          |          | 2        |          | 2         |
| <b>mesenchymal stem cell</b>                                   |          |          |          | <b>1</b> | <b>1</b> |          | <b>2</b> | <b>5</b> | <b>2</b> | <b>1</b> | <b>12</b> |
| adhesions of uterus                                            |          |          |          |          |          |          |          | 1        |          |          | 1         |
| age related macular degeneration                               |          |          |          | 1        |          |          |          |          |          |          | 1         |
| COVID-19                                                       |          |          |          |          |          |          |          | 3        |          |          | 3         |
| diabetic foot ulcer                                            |          |          |          |          |          |          |          |          |          | 1        | 1         |
| graft versus host disease                                      |          |          |          |          | 1        |          |          |          |          |          | 1         |
| interstitial cystitis                                          |          |          |          |          |          |          |          | 1        |          |          | 1         |
| meniscus                                                       |          |          |          |          |          |          | 1        |          |          |          | 1         |
| multiple sclerosis                                             |          |          |          |          |          |          |          |          | 1        |          | 1         |
| osteoarthritis                                                 |          |          |          |          |          |          |          |          | 1        |          | 1         |
| primary ovarian insufficiency                                  |          |          |          |          |          |          | 1        |          |          |          | 1         |
| <b>cardiac muscle cell</b>                                     |          |          |          |          |          |          | <b>3</b> | <b>2</b> | <b>3</b> | <b>4</b> | <b>12</b> |
| cardiomyopathy                                                 |          |          |          |          |          |          | 1        | 1        |          | 1        | 3         |
| congestive heart failure                                       |          |          |          |          |          |          |          |          | 1        |          | 1         |
| heart failure                                                  |          |          |          |          |          |          | 1        | 1        | 2        | 2        | 6         |
| ischemic heart disease                                         |          |          |          |          |          |          | 1        |          |          | 1        | 2         |
| <b>progenitor cell of endocrine pancreas</b>                   |          | <b>1</b> |          | <b>1</b> | <b>2</b> |          | <b>1</b> |          |          | <b>1</b> | <b>6</b>  |
| type 1 diabetes mellitus                                       |          | 1        |          | 1        | 2        |          | 1        |          |          | 1        | 6         |
| <b>neural stem cell</b>                                        |          |          |          | <b>1</b> |          |          | <b>2</b> | <b>1</b> | <b>1</b> |          | <b>5</b>  |
| ischemic cerebrovascular accident                              |          |          |          |          |          |          | 1        |          | 1        |          | 2         |
| Parkinson's disease                                            |          |          |          | 1        |          |          | 1        |          |          |          | 2         |

| Cell types used for therapy           | 2013     | 2014     | 2015     | 2016     | 2017     | 2018     | 2019      | 2020      | 2021      | 2022      | Total      |
|---------------------------------------|----------|----------|----------|----------|----------|----------|-----------|-----------|-----------|-----------|------------|
| spinal cord injury                    |          |          |          |          |          |          |           | 1         |           |           | 1          |
| <b>dopaminergic neuron</b>            |          |          |          |          | 1        | 2        |           |           | 1         | 1         | 5          |
| Parkinson's disease                   |          |          |          |          | 1        | 2        |           |           | 1         | 1         | 5          |
| <b>corneal epithelial cell</b>        |          |          | 1        |          |          |          | 1         |           |           |           | 2          |
| limbal stem cell deficiency           |          |          | 1        |          |          |          | 1         |           |           |           | 2          |
| <b>islet of Langerhans</b>            |          |          |          |          |          |          | 1         |           | 1         |           | 2          |
| type 1 diabetes mellitus              |          |          |          |          |          |          | 1         |           | 1         |           | 2          |
| <b>platelet</b>                       |          |          |          |          |          |          | 1         |           | 1         |           | 2          |
| aplastic anemia                       |          |          |          |          |          |          | 1         |           |           |           | 1          |
| thrombocytopenia                      |          |          |          |          |          |          |           |           | 1         |           | 1          |
| <b>dendritic cell, human</b>          |          |          |          |          |          | 1        | 1         |           |           |           | 2          |
| lung non-small cell carcinoma         |          |          |          |          |          | 1        |           |           |           |           | 1          |
| retinitis pigmentosa                  |          |          |          |          |          |          | 1         |           |           |           | 1          |
| <b>cartilage tissue</b>               |          |          |          |          |          |          |           | 1         |           | 1         | 2          |
| articular cartilage disease           |          |          |          |          |          |          |           | 1         |           | 1         | 2          |
| <b>hematopoietic stem cell</b>        |          |          | 1        |          |          |          | 1         |           |           |           | 2          |
| beta thalassemia                      |          |          | 1        |          |          |          | 1         |           |           |           | 2          |
| <b>hepatocyte</b>                     |          |          |          |          |          | 1        |           |           |           | 1         | 2          |
| acute liver failure                   |          |          |          |          |          |          |           |           |           | 1         | 1          |
| urea cycle disorder                   |          |          |          |          |          | 1        |           |           |           |           | 1          |
| <b>endothelial progenitor cell</b>    |          |          |          |          |          | 1        |           |           |           |           | 1          |
| ischemic cerebrovascular accident     |          |          |          |          |          | 1        |           |           |           |           | 1          |
| <b>cardioblast</b>                    | 1        |          |          |          |          |          |           |           |           |           | 1          |
| ischemic heart disease                | 1        |          |          |          |          |          |           |           |           |           | 1          |
| <b>interneuron</b>                    |          |          |          |          |          |          |           |           |           | 1         | 1          |
| epilepsy                              |          |          |          |          |          |          |           |           |           | 1         | 1          |
| <b>neural progenitor cell</b>         |          |          |          |          |          |          |           |           | 1         |           | 1          |
| spinal cord injury                    |          |          |          |          |          |          |           |           | 1         |           | 1          |
| <b>retina</b>                         |          |          |          |          |          |          |           | 1         |           |           | 1          |
| retinitis pigmentosa                  |          |          |          |          |          |          |           | 1         |           |           | 1          |
| <b>astrocyte</b>                      |          |          |          |          |          | 1        |           |           |           |           | 1          |
| amyotrophic lateral sclerosis         |          |          |          |          |          | 1        |           |           |           |           | 1          |
| <b>corneal endothelial cell</b>       |          |          |          |          |          |          |           |           | 1         |           | 1          |
| bullous keratopathy                   |          |          |          |          |          |          |           |           | 1         |           | 1          |
| <b>oligodendrocyte precursor cell</b> |          |          | 1        |          |          |          |           |           |           |           | 1          |
| spinal cord injury                    |          |          | 1        |          |          |          |           |           |           |           | 1          |
| <b>Grand Total</b>                    | <b>5</b> | <b>1</b> | <b>8</b> | <b>5</b> | <b>6</b> | <b>9</b> | <b>16</b> | <b>18</b> | <b>20</b> | <b>14</b> | <b>102</b> |
